# Supplementary material for: Co-ZIF-9/TiO2 nanostructure for superior CO2 photoreduction activity
Source: Royal Society of Chemistry journal article supplement (doi:10.1039/c6ta04620g), 2016-01-01
Supplement: c6ta04620g1.pdf [file c6ta04620g1.pdf]

## Supplementary Information

### Co-ZIF-9/TiO<sub>2</sub> nanostructure for superior CO<sub>2</sub> photoreduction activity

Shensuo Yan,<sup>†ab</sup> Shuxin Ouyang,<sup>†ab</sup> Hua Xu,<sup>\*ab</sup> Ming Zhao,<sup>ab</sup> Xueliang Zhang<sup>ab</sup> and  
Jinhua Ye<sup>\*abc</sup>

<sup>a</sup> TU-NIMS Joint Research Center, School of Materials Science and Engineering,  
Tianjin University, 92 Weijin Road, Nankai District, Tianjin 300072, P.R. China

<sup>b</sup> Collaborative Innovation Center of Chemical Science and Engineering (Tianjin),  
Tianjin 300072, P.R. China

<sup>c</sup> International Center for Materials Nanoarchitectonics (WPI-MANA), National  
Institute for Materials Science (NIMS), 1-1 Namiki, Tsukuba 305-0044, Japan

E-mail: [xuhua@tju.edu.cn](mailto:xuhua@tju.edu.cn) and [Jinhua.YE@nims.go.jp](mailto:Jinhua.YE@nims.go.jp)

<sup>†</sup> These authors contributed equally to this work.

### Preparation of ZIF<sub>x</sub>/T films

The ZIF<sub>x</sub>/T films used for the electrochemical test were prepared via a spin-coating method. 5 mg of ZIF<sub>x</sub>/T samples were firstly dispersed into 3 mL of ethanol solvent by ultrasonic treatment for 30 min, then spin-coated on the ITO substrate layer by layer. In the procedure of spin coating, every drop of the ZIF<sub>x</sub>/T suspension was about 0.05 mL, and 2 drops of suspension in total was dripped on the ITO substrate in each cycle. The spin speed and time were 200 rpm for 10 s followed with 600 rpm for 40 s. Finally, the coated films were heated to 110 °C at a rate of 1 °C/min and kept at this temperature for 4 h.

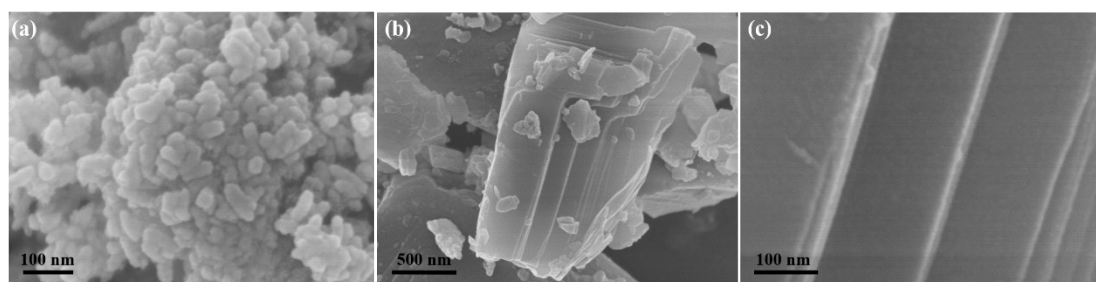

**Fig. S1** SEM images of as-prepared TiO<sub>2</sub> (a), Co-ZIF-9 in low magnification (b) and high magnification (c).

The size and morphology of the as-prepared TiO<sub>2</sub> and Co-ZIF-9 were observed by the SEM. As shown in Fig. S1a, pure TiO<sub>2</sub> consists of large amounts of small nanoparticles aggregated together. The Co-ZIF-9 appears as the assembly of sheets with the length of ~2 μm (Fig. S1b-c), and the TEM image further confirmed that those sheets are only several nanometers in thickness (Fig. 3a).

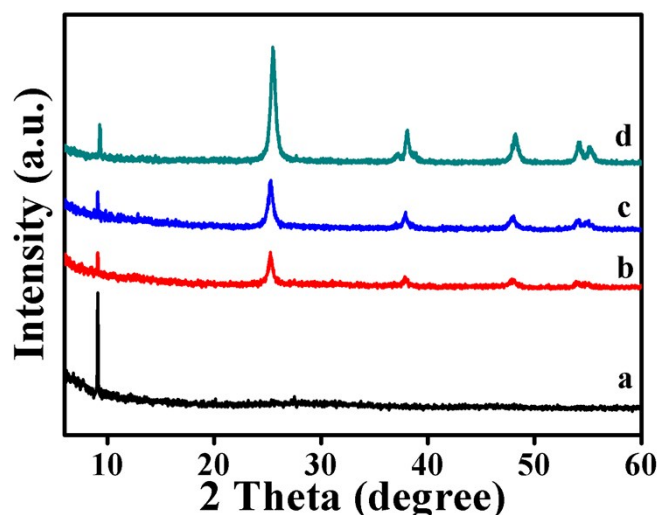

**Fig. S2** XRD patterns of the intermediate products obtained at various crystal growth stages for ZIF<sub>0.10</sub>/T composite. (a) hydrolysis of Ti precursor to obtain amorphous TiO<sub>2</sub> over Co-ZIF-9 after 12 h of magnetic stirring. (b-d) crystalline of TiO<sub>2</sub> after 3, 6, 12 h of solvothermal treatment.

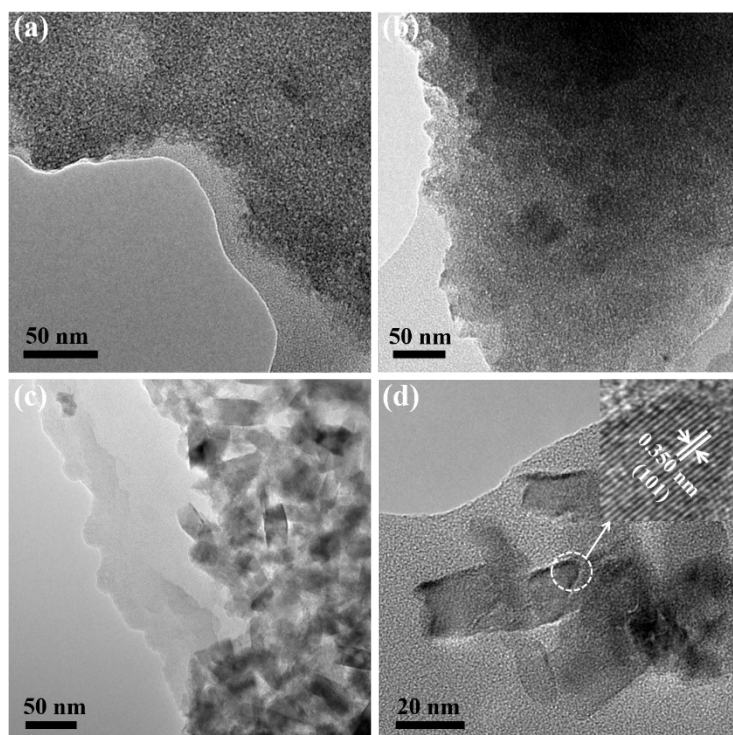

**Fig. S3** TEM images of the intermediate products obtained at various crystal growth stages for ZIF<sub>0.10</sub>/T composite. (a) hydrolysis of Ti precursor to obtain amorphous TiO<sub>2</sub> over Co-ZIF-9 after 12 h of magnetic stirring. (b-d) crystalline of TiO<sub>2</sub> after 3, 6, 12 h of solvothermal treatment.

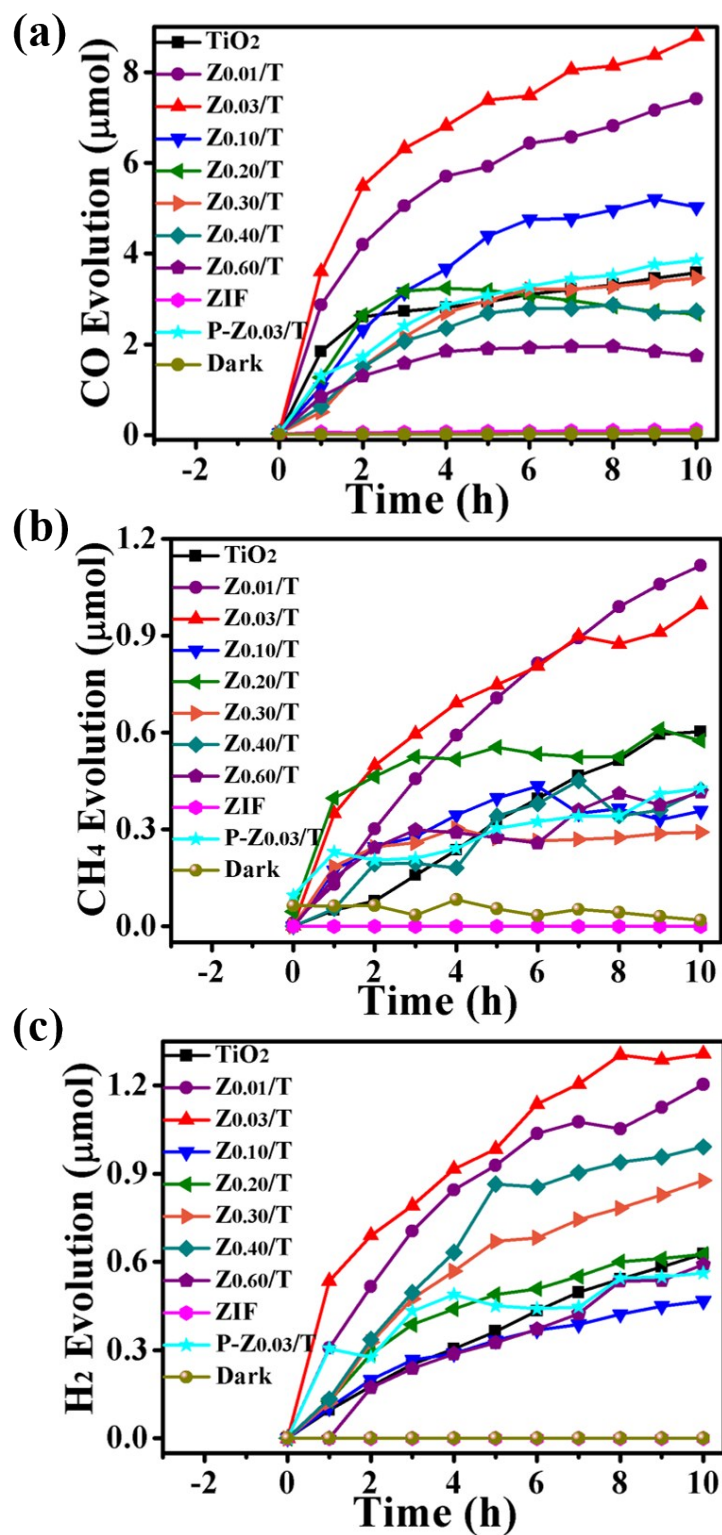

**Fig. S4** CO<sub>2</sub> photoreduction activity of as-prepared TiO<sub>2</sub> and ZIF<sub>x</sub>/T composites. (a) CO, (b) CH<sub>4</sub>, and (c) H<sub>2</sub> evolution.

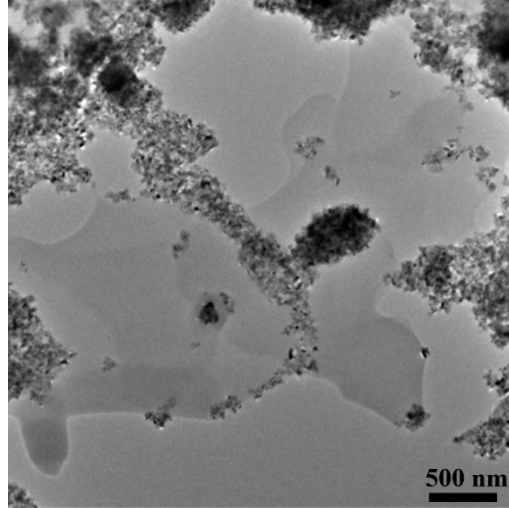

**Fig. S5** TEM image of physically mixed Co-ZIF-9/TiO<sub>2</sub> composite (P-ZIF<sub>0.03</sub>/T).

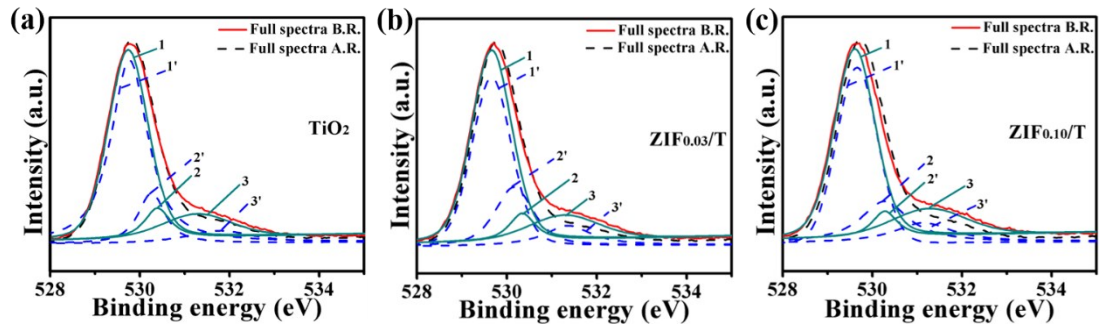

**Fig. S6** O 1s XPS spectra of (a) TiO<sub>2</sub>, (b) ZIF<sub>0.03</sub>/T, and (c) ZIF<sub>0.10</sub>/T before reaction (B. R., solid line) and after reaction (A. R., dashed line). Curves 1&1', curves 2&2', and curves 3&3' in (a, b, c) associate with lattice O, adsorbed  $\text{O}_2^-$ , and -OH, respectively.

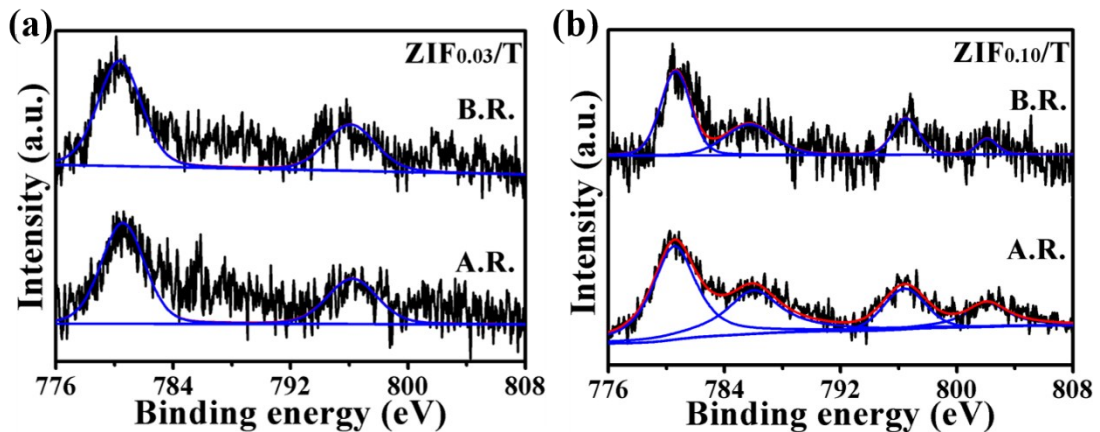

**Fig. S7** Co 2p XPS spectra of (a) ZIF<sub>0.03</sub>/T and (b) ZIF<sub>0.10</sub>/T before reaction (B. R.) and after reaction (A. R.).

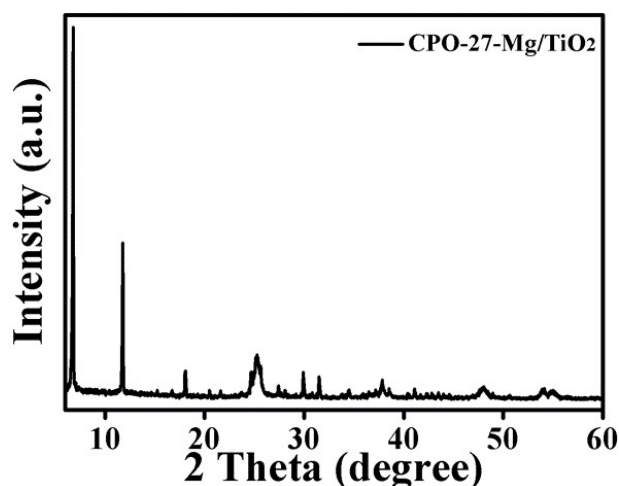

**Fig. S8** XRD pattern of prepared CPO-27-Mg/TiO<sub>2</sub>.

CPO-27-Mg/TiO<sub>2</sub> composite was prepared according to the procedure described in the literature [*Appl. Catal. B: Environ.*, 2016, 183, 47]. Firstly, 0.61 mmol of H<sub>4</sub>DOBDC (BOBDC = 2,5-dioxido-1,4-benzenedicarboxylate) was dissolved in 18 mL of tetrahydrofuran in the 50 ml of Teflon inlet of autoclave, then 2.5 mL of NaOH (1 mol·L<sup>-1</sup>) was added to this solution under constant stirring. After that, 2 mmol of TiO<sub>2</sub> and 1.21 mmol of Mg(NO<sub>3</sub>)<sub>2</sub>·6H<sub>2</sub>O in 5 mL of de-ionized water was added to the above solution. After 30 min of vigorous stirring, the autoclave was sealed and heated at 110 °C for 72 h. The final product was collected by filtration, washed thoroughly with methanol and water for several times, then dried at 60 °C in vacuum.

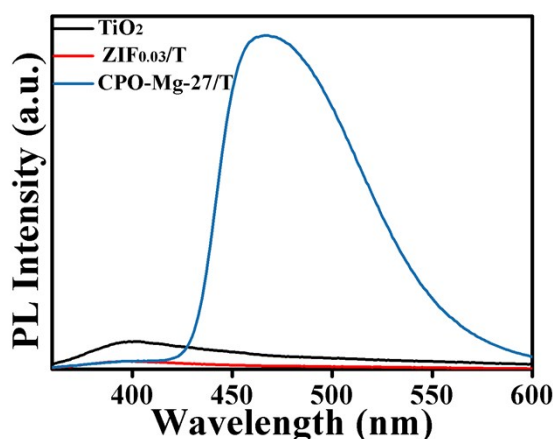

**Fig. S9** Photoluminescence (PL) spectra of TiO<sub>2</sub>, ZIF<sub>0.03</sub>/T, and CPO-27-Mg/TiO<sub>2</sub>.

**Table. S1** Binding energy (eV) of Co 2p XPS spectra in ZIF<sub>0.03</sub>/T and ZIF<sub>0.10</sub>/T samples.

|                        | Co 2p <sub>3/2</sub> |        | Satellite peak 1 |        | Co 2p <sub>1/2</sub> |        | Satellite peak 2 |        |
|------------------------|----------------------|--------|------------------|--------|----------------------|--------|------------------|--------|
|                        | B.R.                 | A.R.   | B.R.             | A.R.   | B.R.                 | A.R.   | B.R.             | A.R.   |
| ZIF <sub>0.03</sub> /T | 780.44               | 780.50 | -                | -      | 796.15               | 796.20 | -                | -      |
| ZIF <sub>0.10</sub> /T | 780.63               | 780.54 | 785.72           | 785.90 | 796.49               | 796.40 | 802.08           | 802.12 |

**Table S2** CO<sub>2</sub> photoreduction activity of ZIF<sub>0.03</sub>/T in contrast to the Co(NO<sub>3</sub>)<sub>2</sub>/TiO<sub>2</sub> composite and the reported CPO-27-Mg/TiO<sub>2</sub> nanocomposite under the irradiation of Xe lamp in 10 h.

|                                                     | CO<br>( $\mu\text{mol}$ ) | CH <sub>4</sub><br>( $\mu\text{mol}$ ) | H <sub>2</sub><br>( $\mu\text{mol}$ ) | UPN<br>( $\mu\text{mol}$ ) |
|-----------------------------------------------------|---------------------------|----------------------------------------|---------------------------------------|----------------------------|
| TiO <sub>2</sub>                                    | 3.58                      | 0.60                                   | 0.62                                  | 13.24                      |
| ZIF <sub>0.03</sub> /T                              | 8.79                      | 0.99                                   | 1.30                                  | 28.17                      |
| Co(NO <sub>3</sub> ) <sub>2</sub> /TiO <sub>2</sub> | 3.66                      | 0.62                                   | 0.91                                  | 14.14                      |
| CPO-27-Mg/TiO <sub>2</sub>                          | 5.56                      | 1.19                                   | 0.21                                  | 21.15                      |
